# Supplementary material for: Preparation and Characterization of New Electrospun Poly(lactic acid) Nanofiber Antioxidative Active Packaging Films Containing MCM-41 Mesoporous Molecular Sieve Loaded with Phloridzin and Their Application in Strawberry Packaging
Source: MDPI journal article supplement (doi:10.3390/nano12071229), 2022-04-06
Supplement: s1 [file s1]

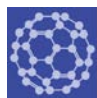

# Preparation and Characterization of New Electrospun Poly(lactic acid) Nanofiber Antioxidative Active Packaging Films Containing MCM-41 Mesoporous Molecular Sieve Loaded with Phloridzin and their Application in Strawberry Packaging

Yuan Xie<sup>1</sup>, Guiguang Cheng<sup>2</sup>, Zhoushan Wu<sup>3</sup>, Shang Shi<sup>3</sup>, Jinghao Zhao<sup>3</sup>, Lin Jiang<sup>1</sup>, Dengbang Jiang<sup>1</sup>, Mingwei Yuan<sup>1</sup>, Yudan Wang<sup>1,3,\*</sup> and Minglong Yuan<sup>1,\*</sup>

<sup>1</sup> School of Chemistry and Environment, National and Local Joint Engineering Research Center for Green Preparation Technology of Biobased Materials, Yunnan Minzu University, Kunming 650500, China; yu-an18787028972@sina.com (Y.X.); ggcheng@kust.edu.cn (G.C.); jianglin@ymu.edu.cn (L.J.); 041814@ymu.edu.cn (D.J.); 041808@ymu.edu.cn (M.Y.)

<sup>2</sup> Faculty of Food Science and Engineering, Kunming University of Science and Technology, Kunming 650500, China

<sup>3</sup> Key Laboratory of Chemistry in Ethnic Medicinal Resources, State Ethnic Affairs Commission & Ministry of Education, Yunnan Minzu University, Kunming 650500, China; 21227038010037@ymu.edu.cn (Z.W.); 15807220798@sina.cn (S.S.); jinghaozhao1019@sina.com (J.Z.)

\* Correspondence: wangyudan@ymu.edu.cn (Y.W.); yml@ynni.edu.cn (M.Y.)

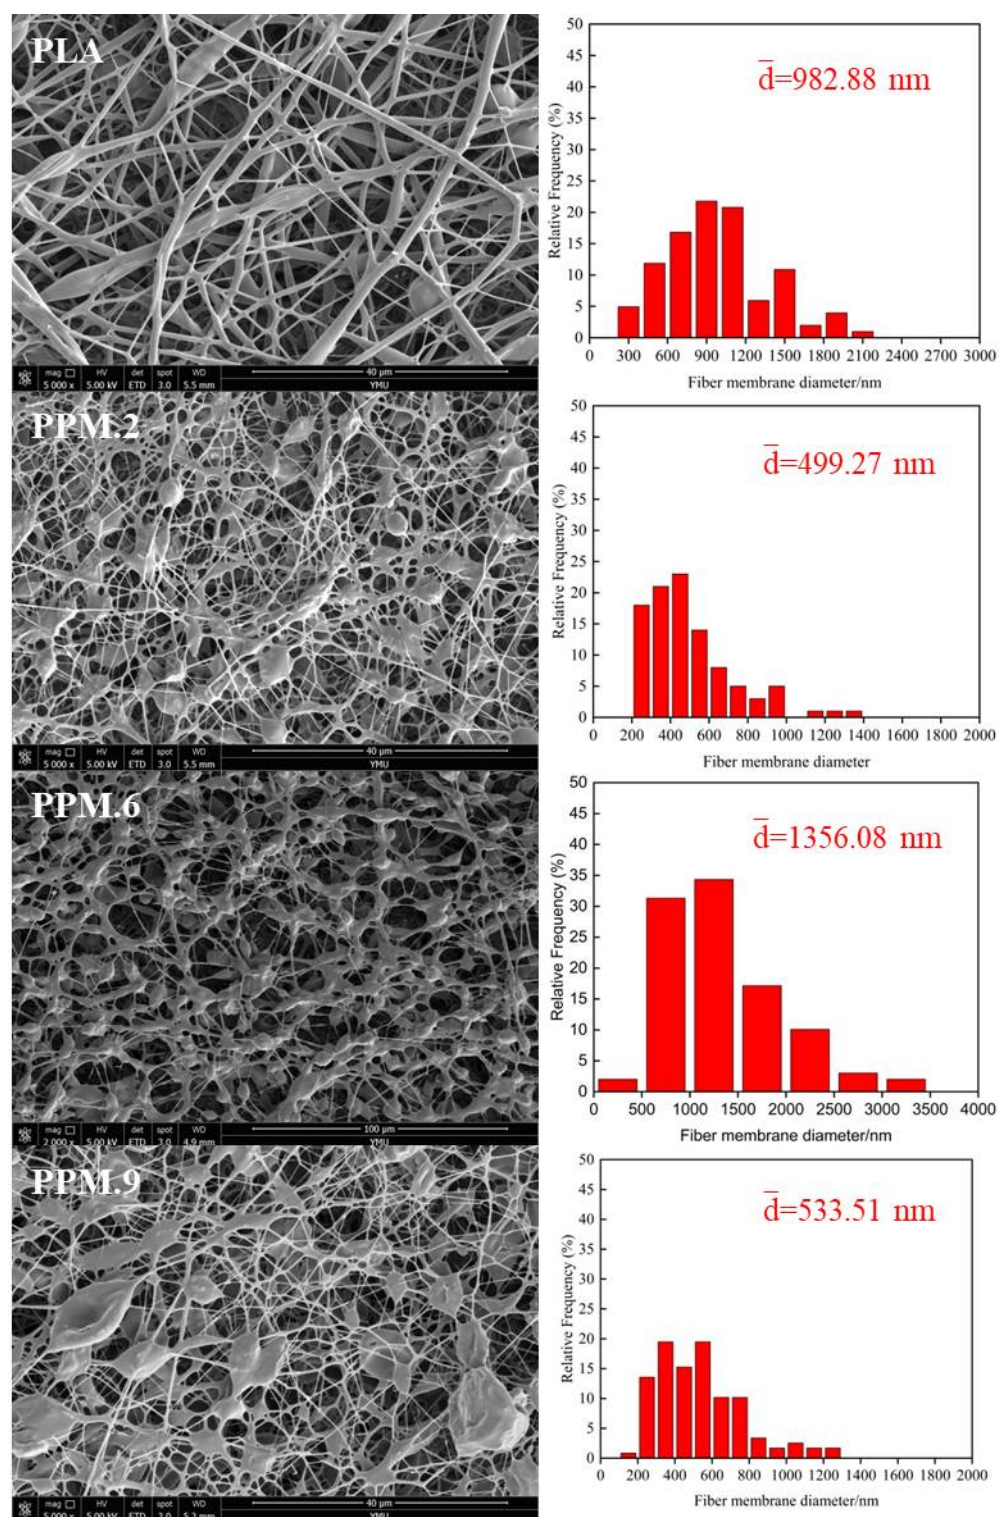

Figure S1. Nanofibers and size distribution of PLA and samples 2, 6 and 9.

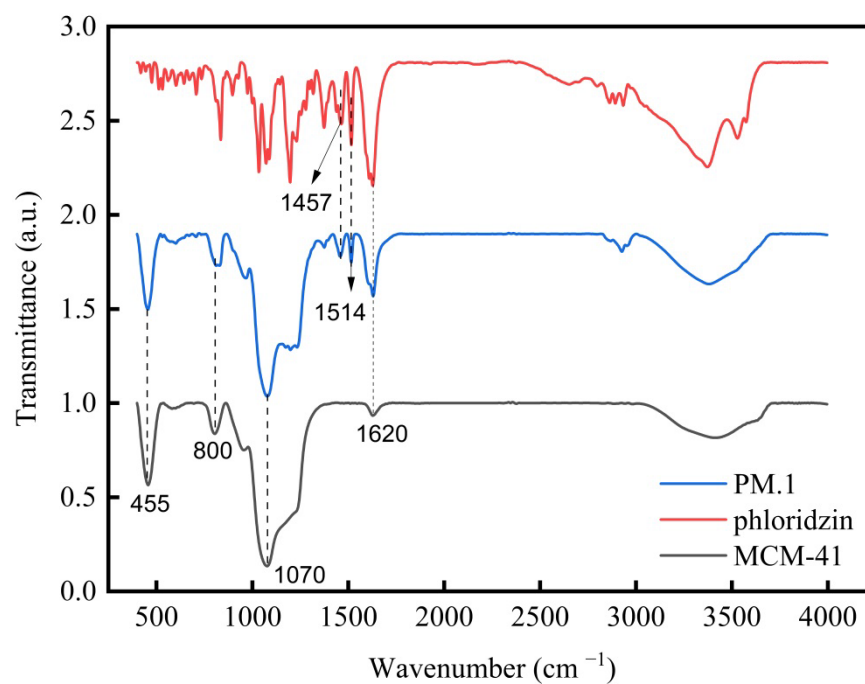

**Figure S2.** Infrared images of MCM-41, phlorizin and assembly sample 1.

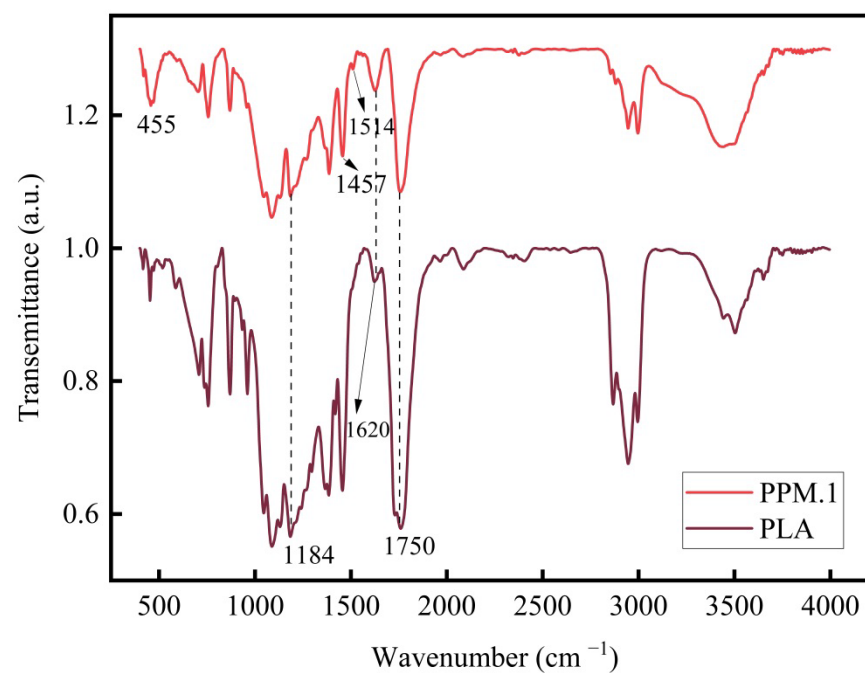

**Figure S3.** Infrared spectrum of pure PLA as thin film sample 1.
